# Supplementary figures and images for: Surfactant-laden droplet size prediction in a flow-focusing microchannel: a data-driven approach
Source: Royal Society of Chemistry journal article supplement (doi:10.1039/d2lc00416j), 2022-01-01

Raw image

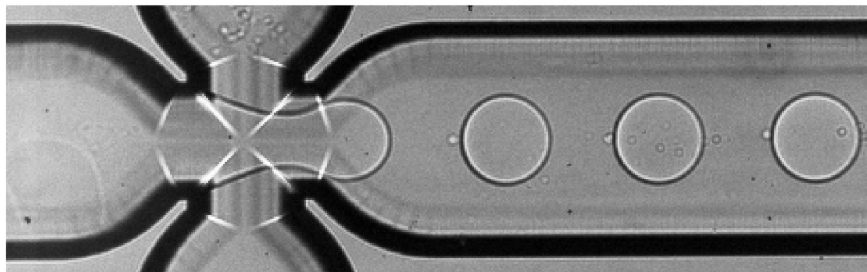

Droplet detection with MATLAB(imfindcircles function)

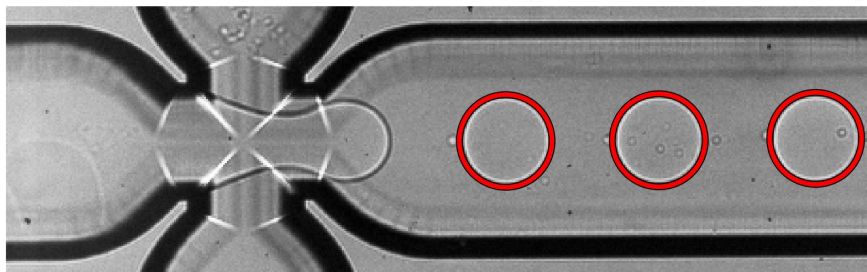

Supplement: d2lc00416j2.pdf [file d2lc00416j2.pdf]
